# Supplementary material
Source: publisher site journal article supplement (https://www.dovepress.com/article/569742)
Supplement: Supplementary file 1 [file 569742_Supplementary%20materials_1.docx]

**
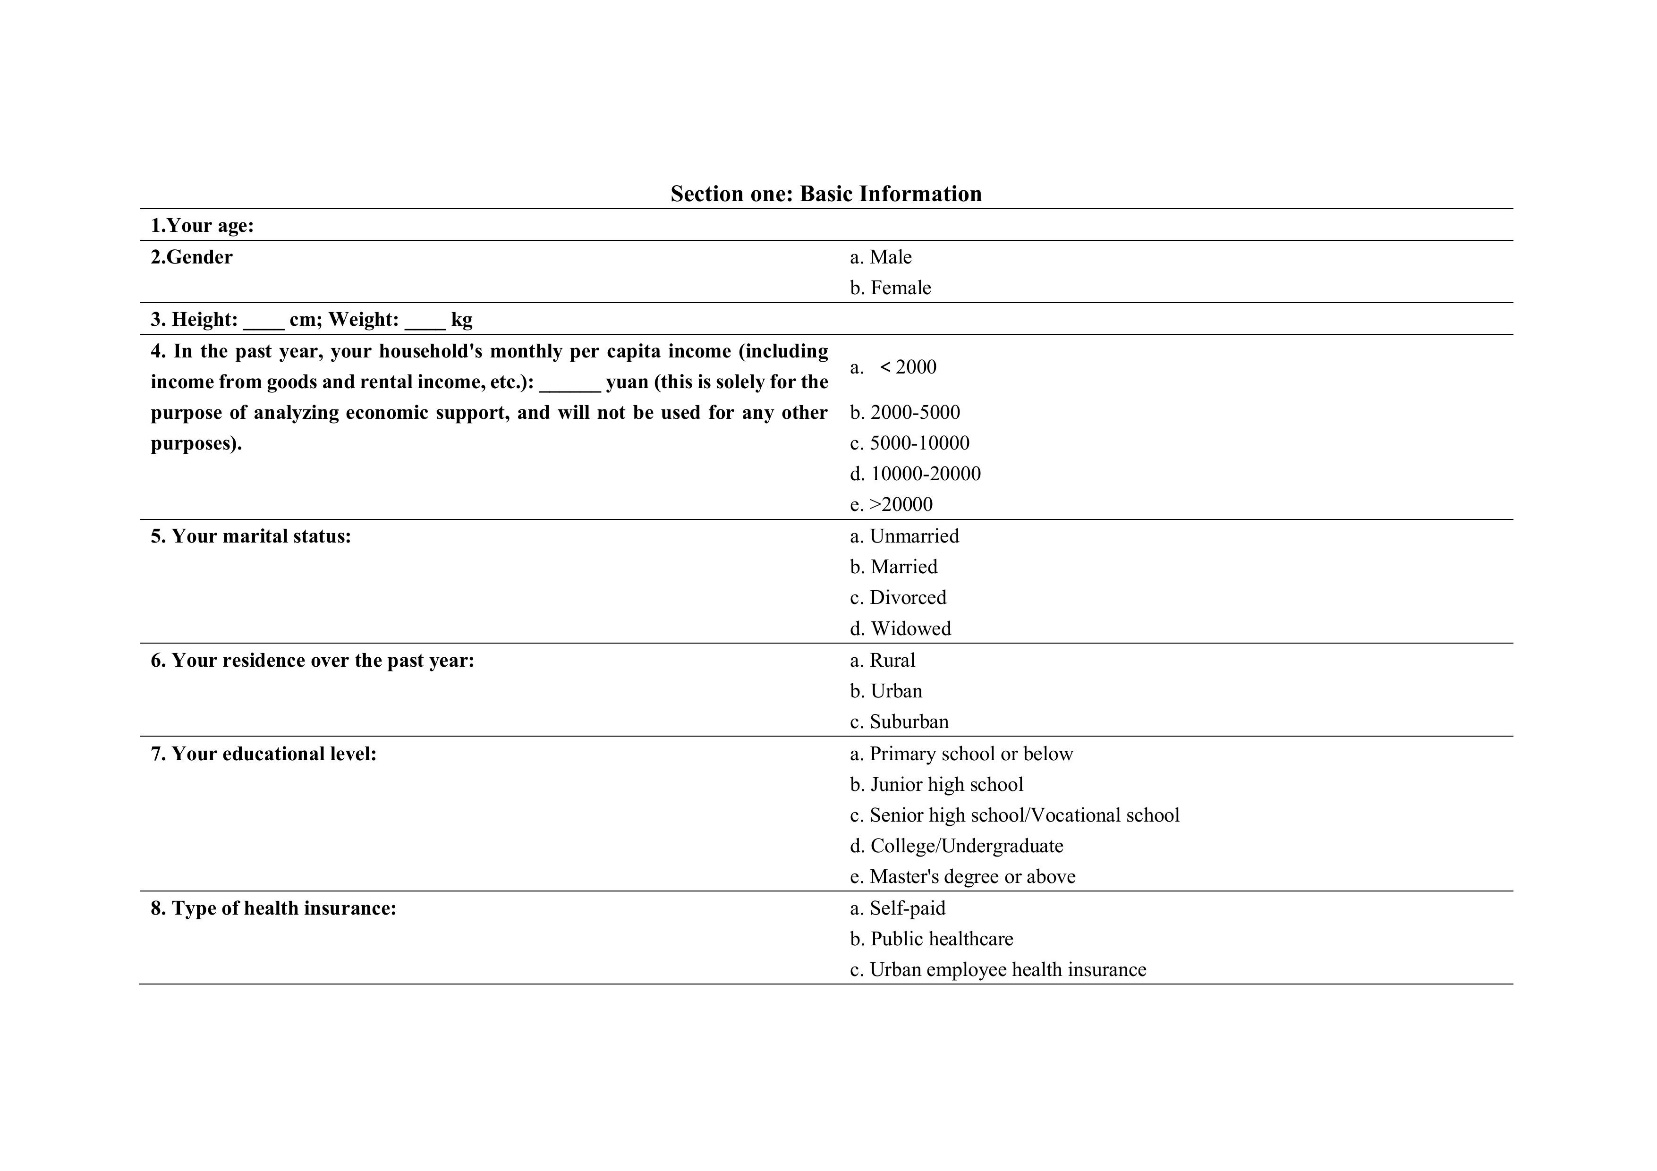
**

**Supplementary Figure 1. Blank questionnaire (Page 1)**

**
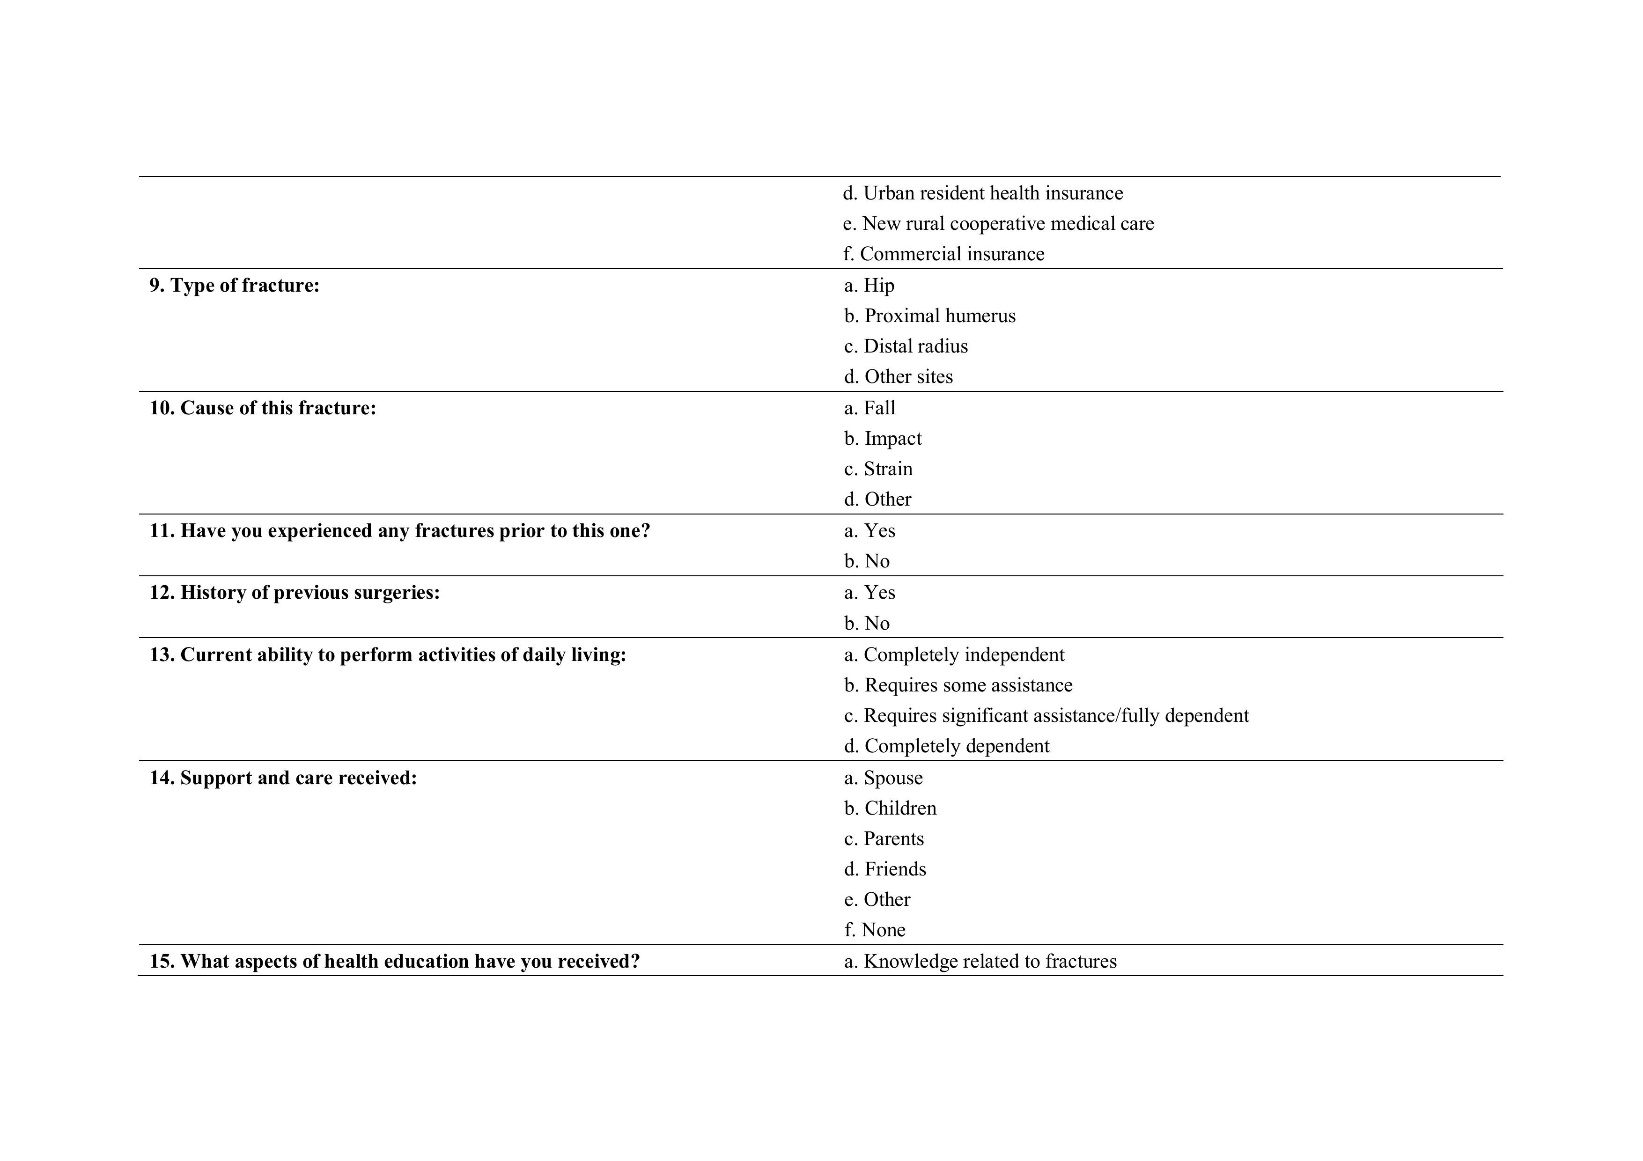
**

**Supplementary Figure 2. Blank questionnaire (Page 2)**

**
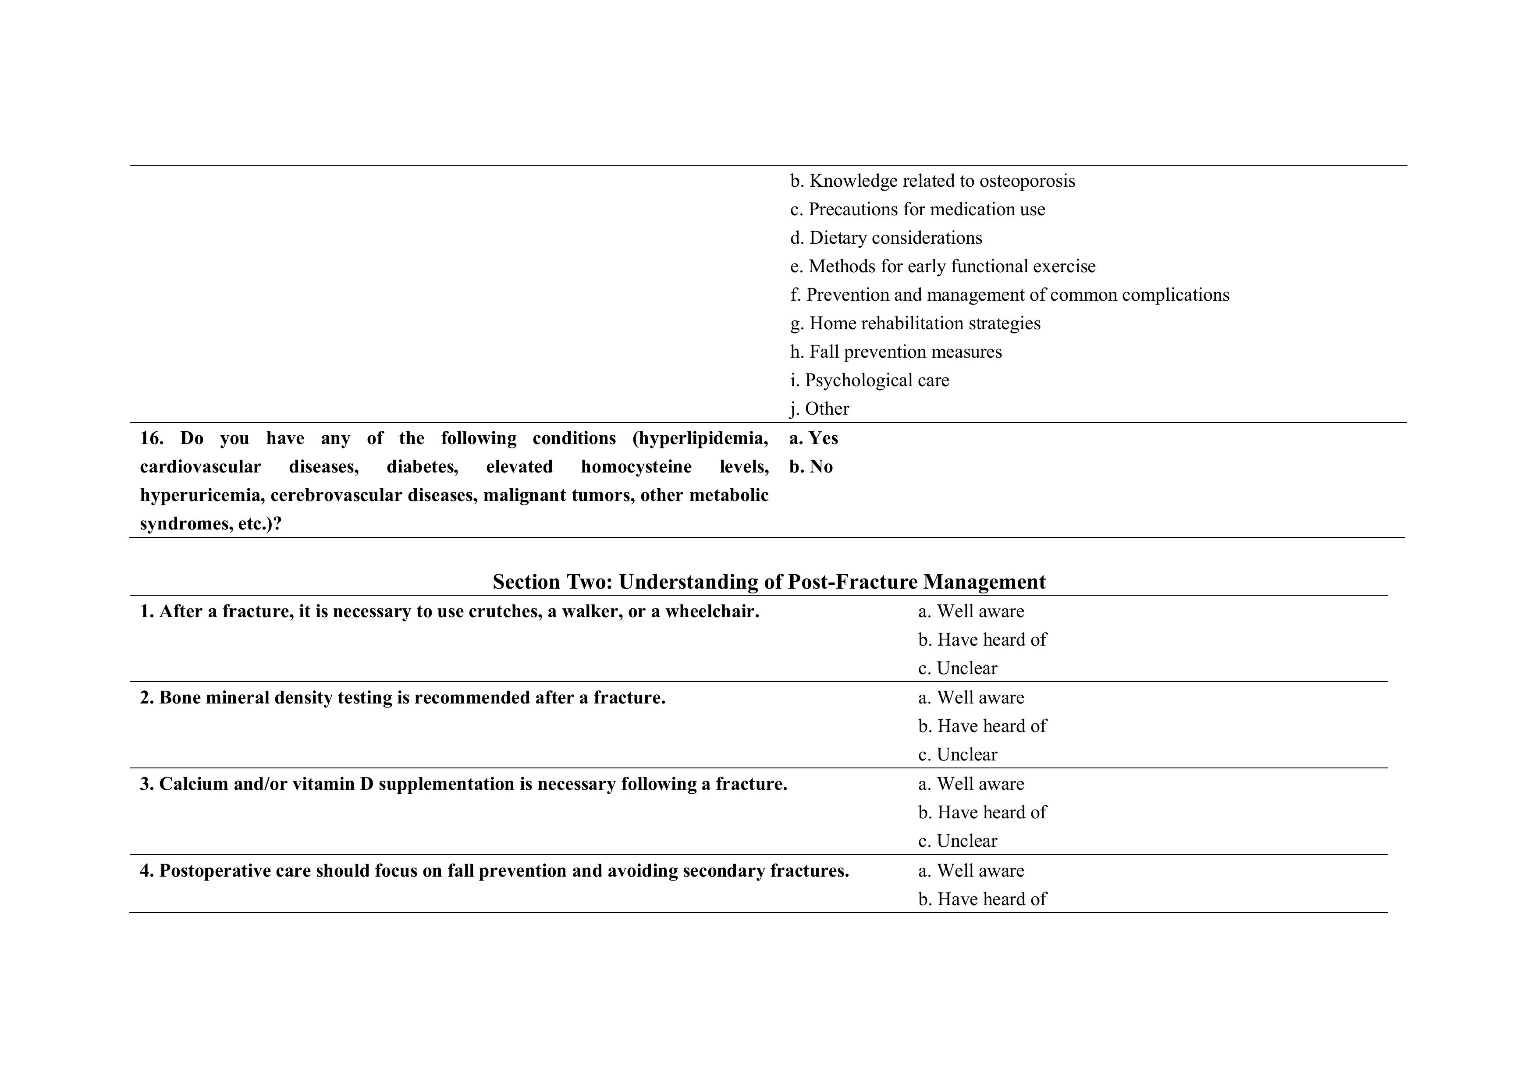
**

**Supplementary Figure 3. Blank questionnaire (Page 3)**

**
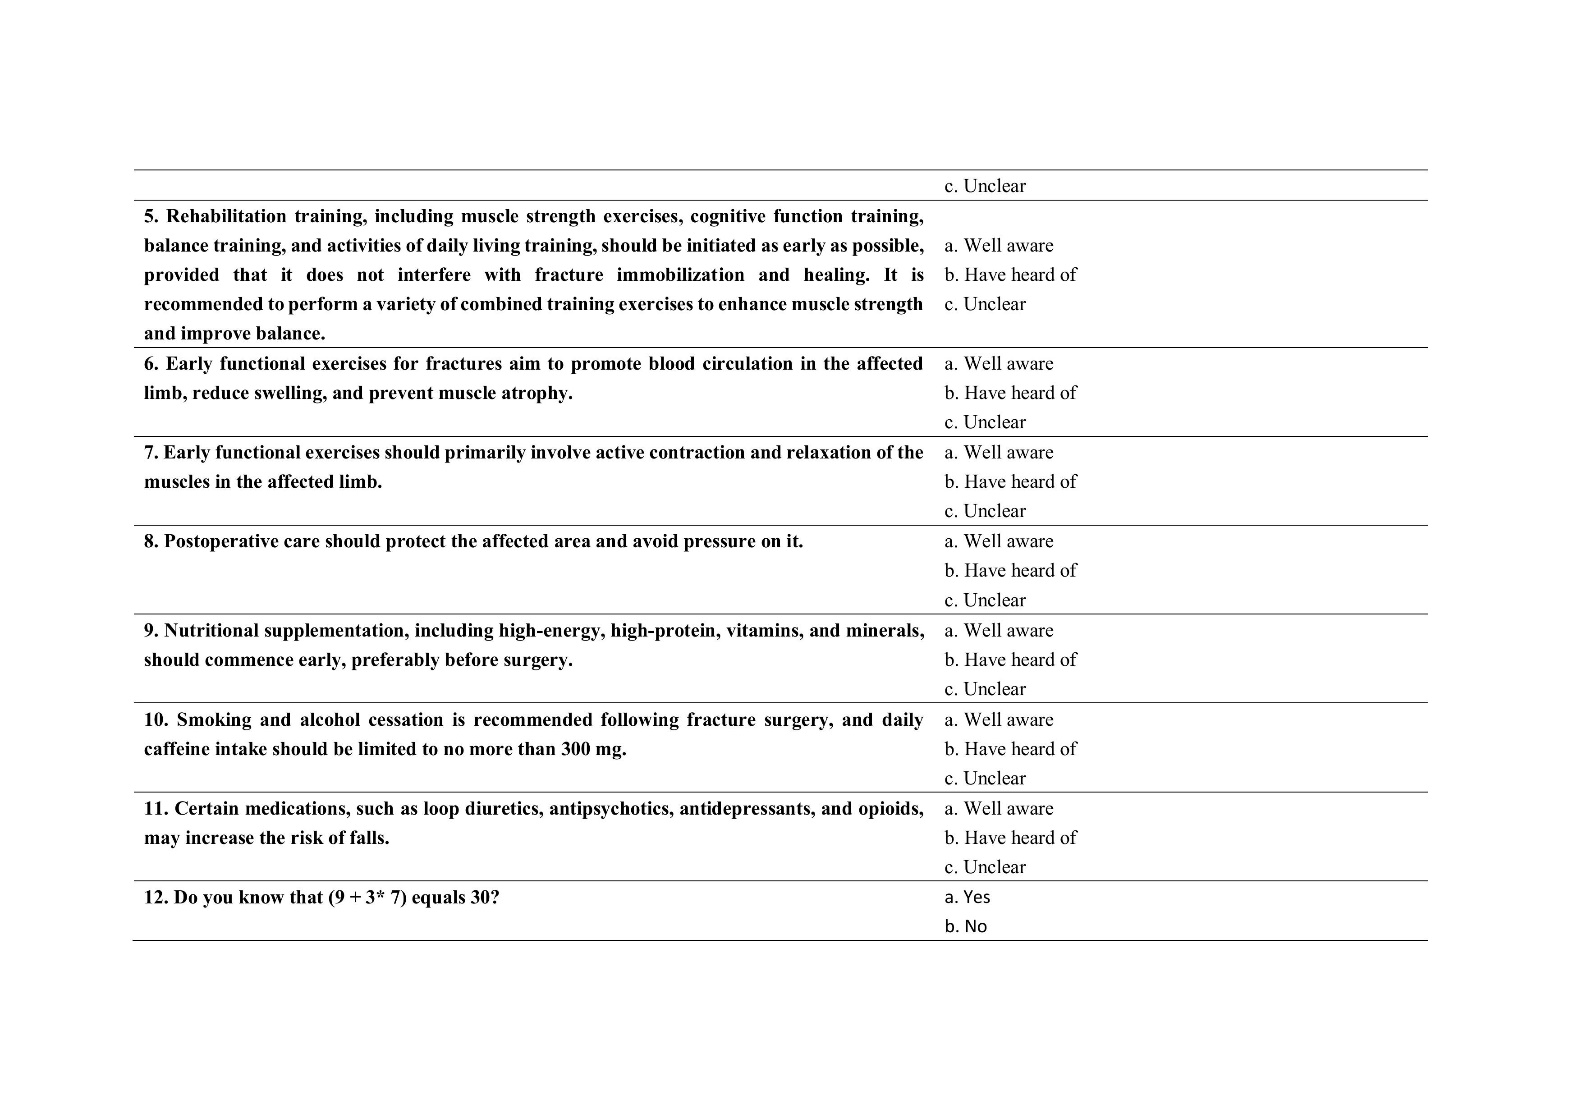
**

**Supplementary Figure 4. Blank questionnaire (Page 4)**

**
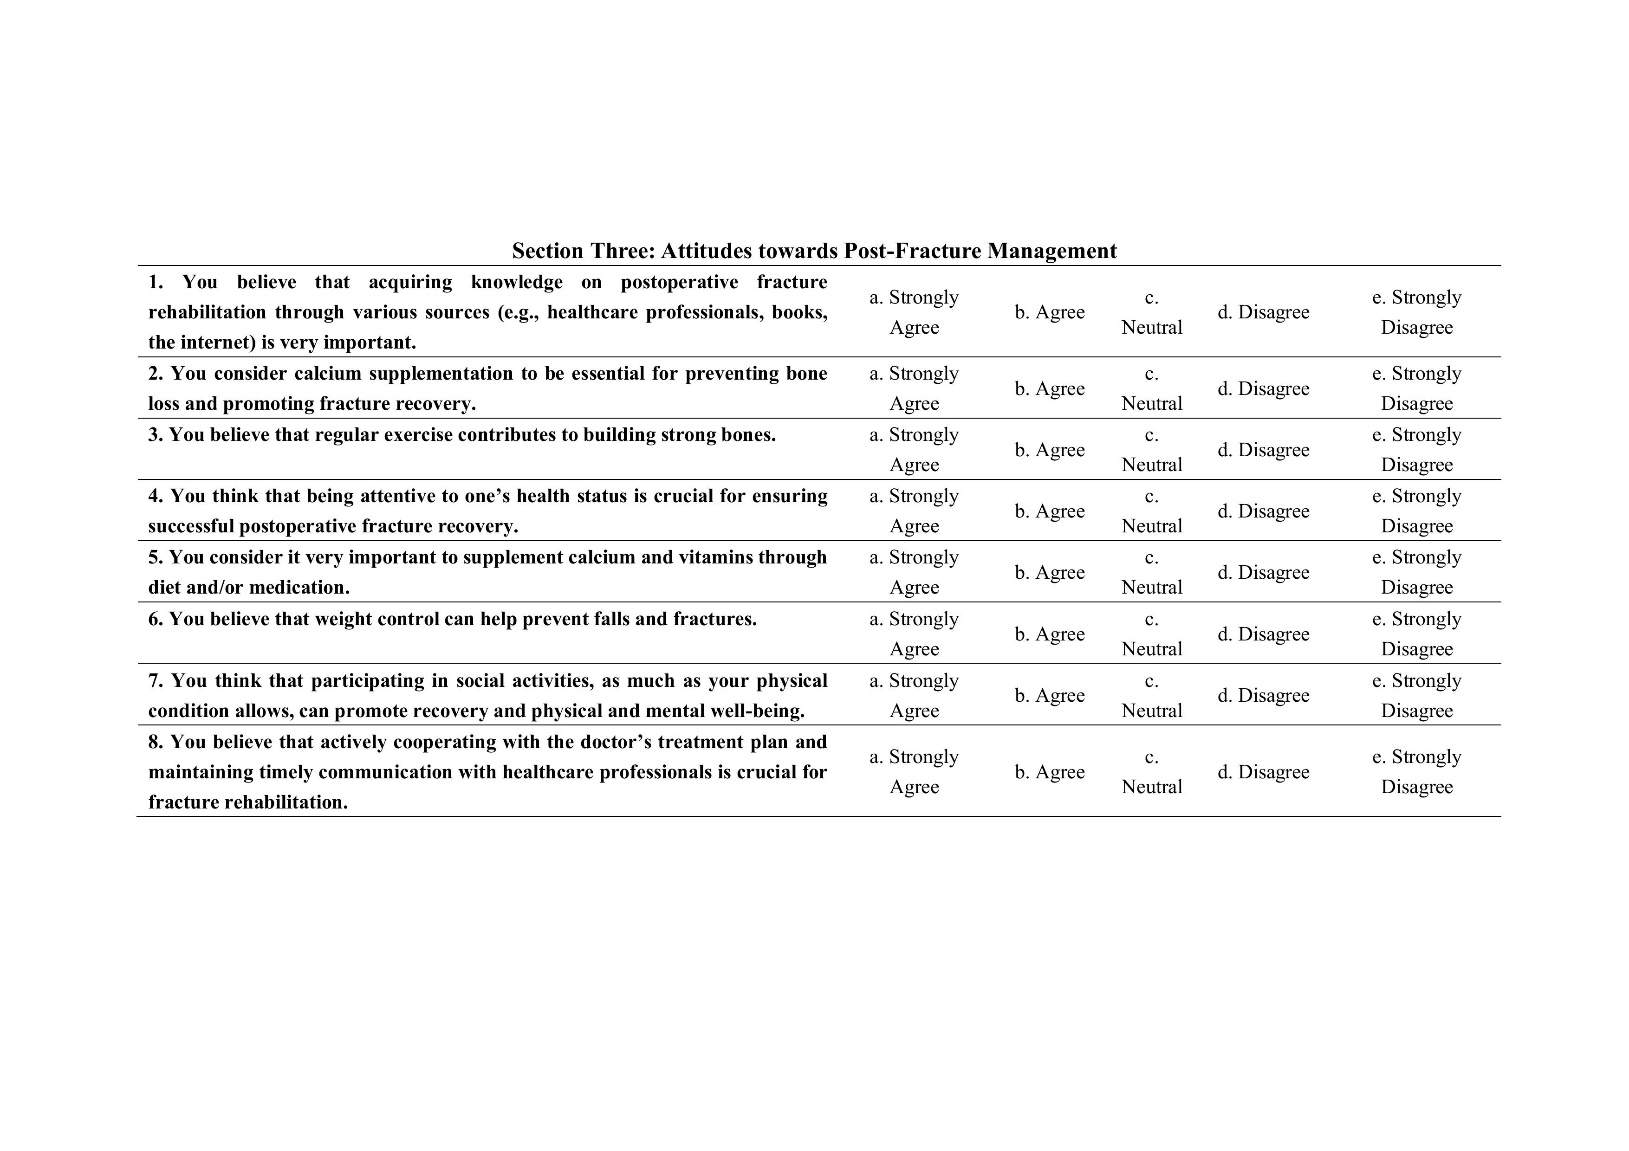
**

**Supplementary Figure 5. Blank questionnaire (Page 5)**

**
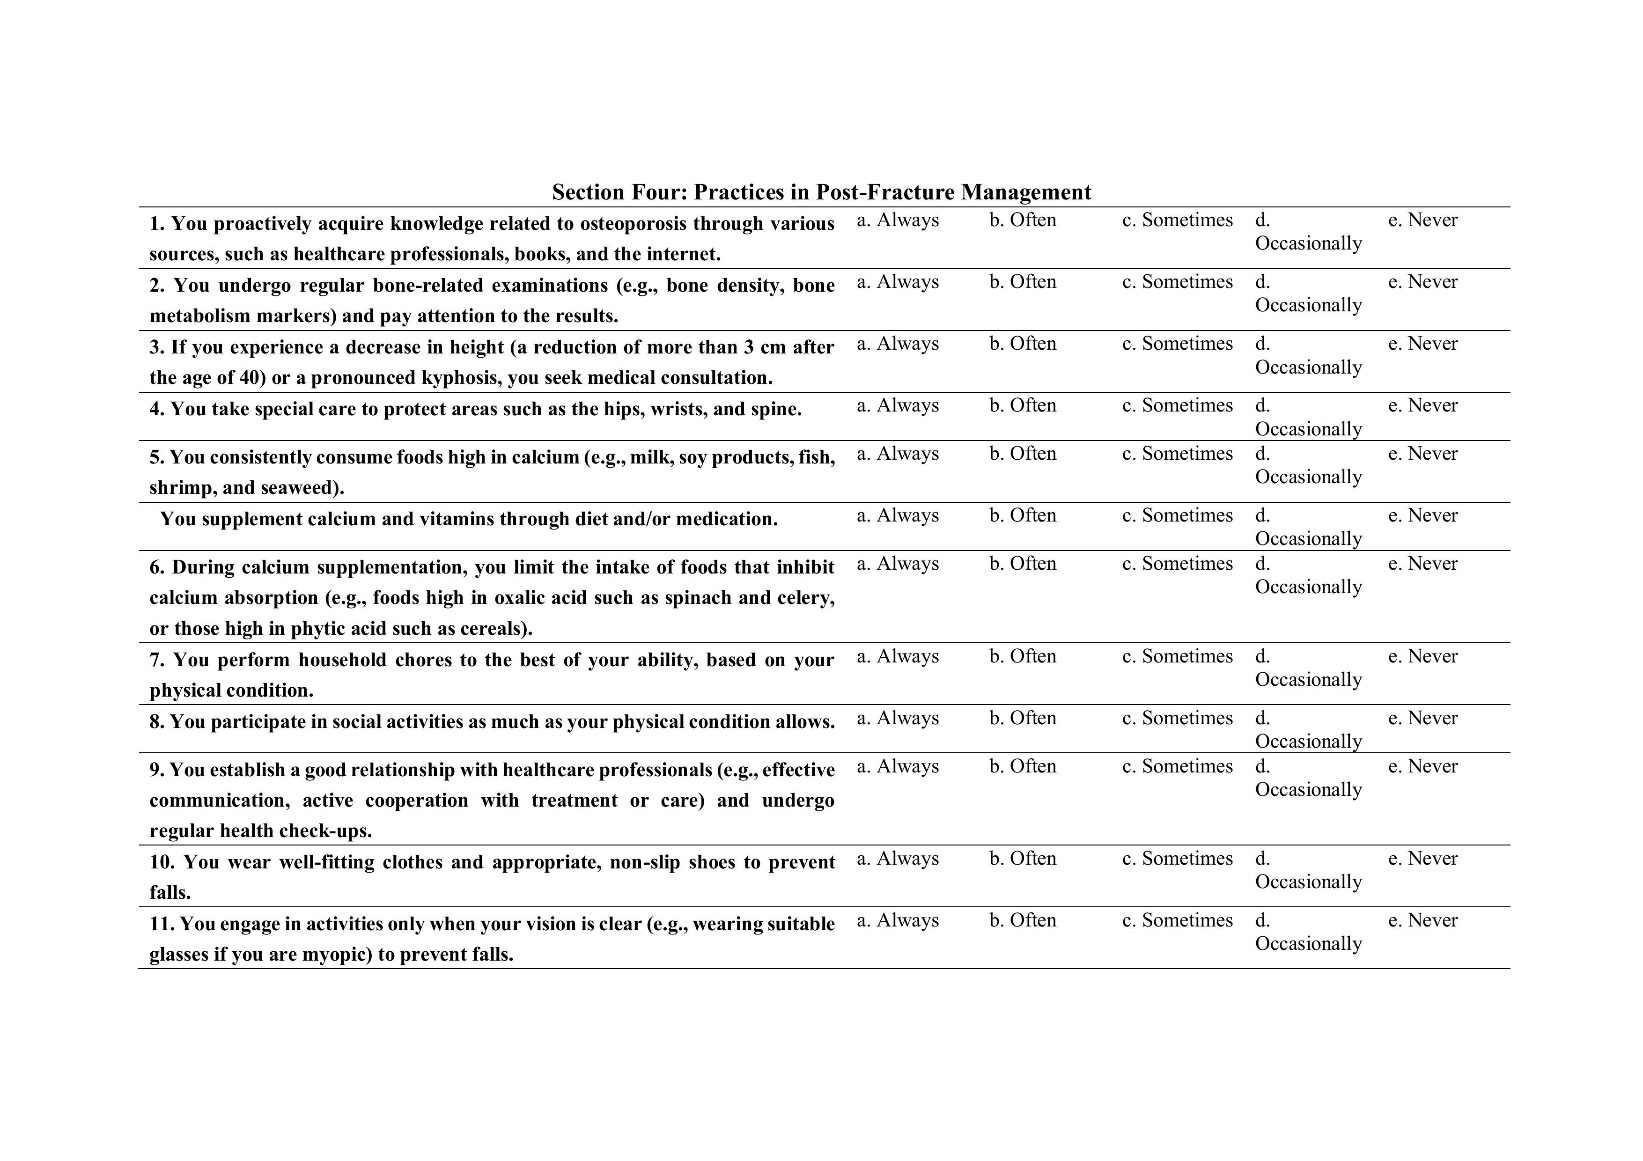
**

**Supplementary Figure 6. Blank questionnaire (Page 6)**

**
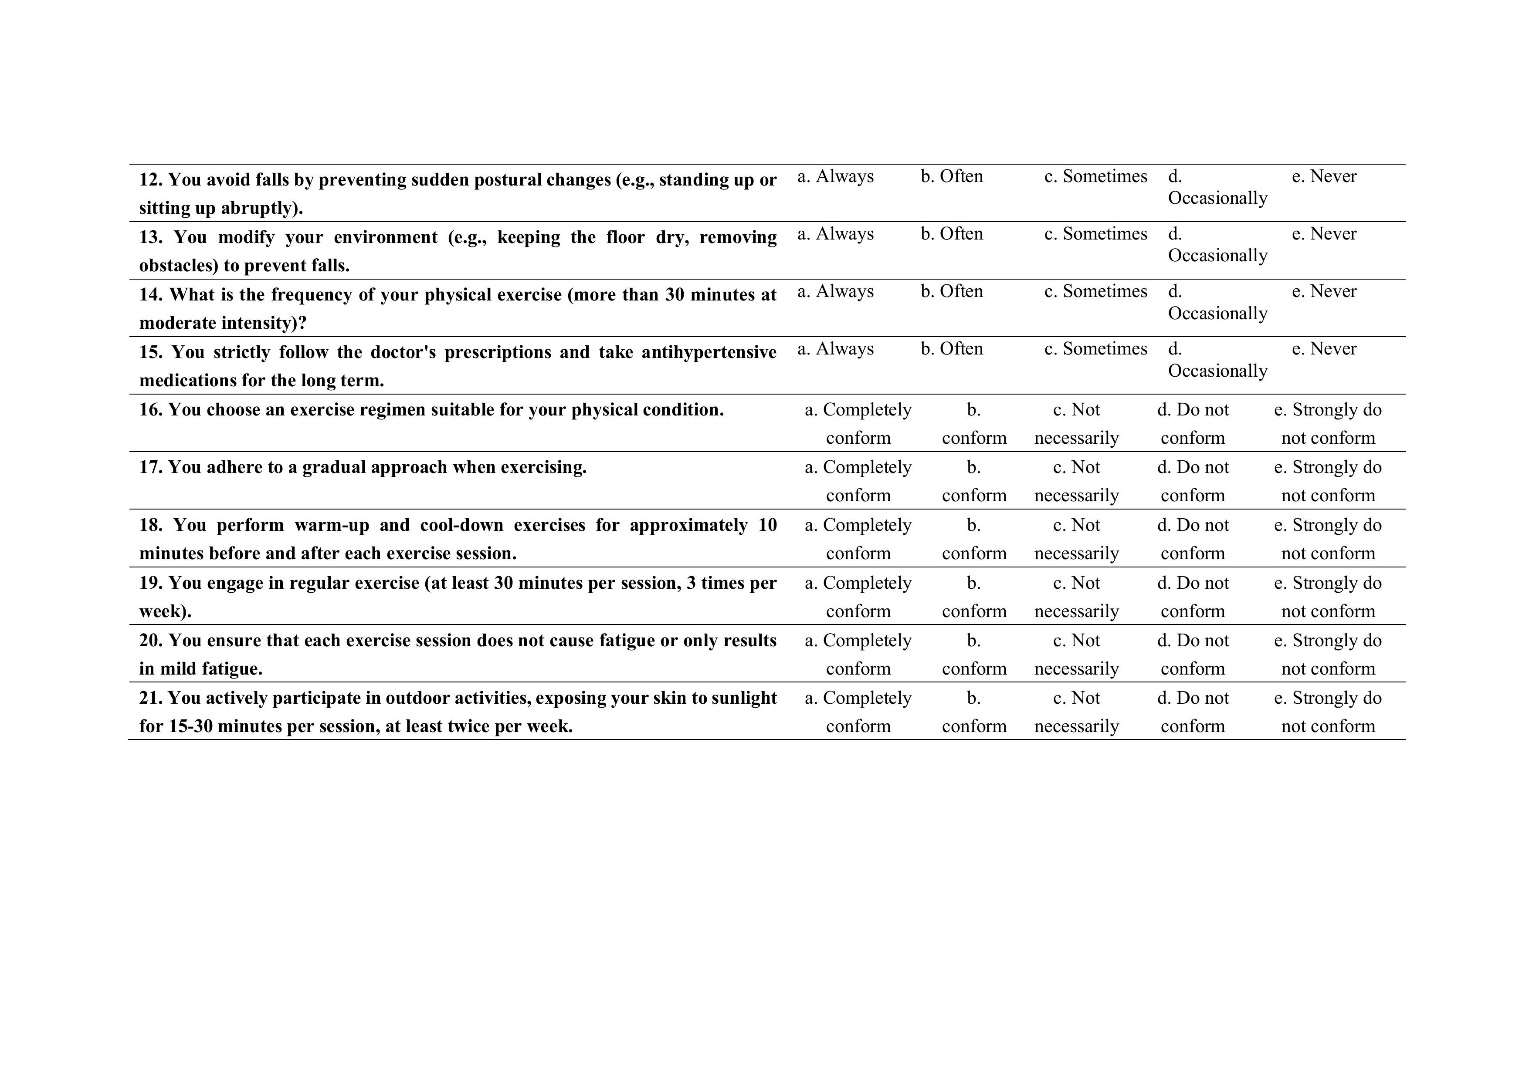
**

**Supplementary Figure 7. Blank questionnaire (Page 7)**

**

**

**Supplementary Figure 8. Health Education received.**

**Supplement Table 1. Comparison of baseline demographic and clinical characteristics between online and offline (telephone) respondents**

|  | Total (n=556) | Online group (n=501) | Telephone group (n=55) | P |
| --- | --- | --- | --- | --- |
| **Age (years)** | 53.56±15.49 | 53.73 (15.52) | 52.93 (15.36) |  |
| ≤30 | 46 (8.27) | 42 (8.4) | 4 (7.3) | 0.958 |
| 31–40 | 78 (14.03) | 68 (13.6) | 10 (18.2) |  |
| 41–50 | 94 (16.91) | 86 (17.2) | 8 (14.5) |  |
| 51–60 | 142 (25.54) | 128 (25.5) | 14 (25.5) |  |
| 61–70 | 110 (19.78) | 99 (19.8) | 11 (20.0) |  |
| >70 | 86 (15.47) | 78 (15.6) | 8 (14.5) |  |
| **Sex** |  |  |  |  |
| Male | 277 (49.82) | 248 (49.5) | 29 (52.7) | 0.755 |
| Female | 279 (50.18) | 253 (50.5) | 26 (47.3) |  |
| **BMI** |  |  |  |  |
| <18.5 | 39 (7.01) | 36 (7.2) | 3 (5.5) | 0.609 |
| 18.5-23.9 | 278 (50.00) | 253 (50.5) | 25 (45.5) |  |
| >24.0 | 239 (42.99) | 212 (42.3) | 27 (49.1) |  |
| **Monthly per capita income (CNY)** |  |  |  |  |
| ＜2,000 | 73 (13.13) | 63 (12.6) | 10 (18.2) | <0.001 |
| 2,000-5,000 | 183 (32.91) | 153 (30.5) | 30 (54.5) |  |
| 5,000-10,000 | 223 (40.11) | 208 (41.5) | 15 (27.3) |  |
| 10,000-20,000 | 63 (11.33) | 63 (12.6) | 0 (0.0) |  |
| >20,000 | 14 (2.52) | 14 (2.8) | 0 (0.0) |  |
| **Marital status** |  |  |  |  |
| Unmarried/Divorced/Widowed | 45 (8.09) | 41 (8.2) | 4 (7.3) | 0.999 |
| Married | 511 (91.91) | 460 (91.8) | 51 (92.7) |  |
| **Place of residence** |  |  |  |  |
| Rural | 182 (32.73) | 147 (29.3) | 35 (63.6) | <0.001 |
| Urban | 199 (35.79) | 193 (38.5) | 6 (10.9) |  |
| Suburban | 175 (31.47) | 161 (32.1) | 14 (25.5) |  |
| **Educational level** |  |  |  |  |
| Primary school or below | 286 (51.44) | 255 (50.9) | 31 (56.4) | 0.491 |
| Junior high school | 125 (22.48) | 111 (22.2) | 14 (25.5) |  |
| Senior high school/Vocational secondary school | 70 (12.59) | 64 (12.8) | 6 (10.9) |  |
| Junior college/Bachelor’s degree or above | 75 (13.49) | 71 (14.2) | 4 (7.3) |  |
| **Medical insurance type** |  |  |  |  |
| Self-paid | 156 (28.06) | 140 (27.9) | 16 (29.1) | 0.983 |
| Insurance reimbursement | 400 (71.94) | 361 (72.1) | 39 (70.9) |  |
| **Fracture type** |  |  |  |  |
| Hip | 112 (20.14) | 100 (20.0) | 12 (21.8) | 0.602 |
| Proximal humerus | 54 (9.71) | 47 (9.4) | 7 (12.7) |  |
| Distal radius | 63 (11.33) | 55 (11.0) | 8 (14.5) |  |
| Other sites | 327 (58.81) | 299 (59.7) | 28 (50.9) |  |
| **Cause of fracture** |  |  |  |  |
| Fall | 380 (68.35) | 342 (68.3) | 38 (69.1) | 0.925 |
| Impact injury | 121 (21.76) | 110 (22.0) | 11 (20.0) |  |
| Other | 55 (9.89) | 49 (9.8) | 6 (10.9) |  |
| **Have you ever sustained a fracture before this fracture?** |  |  |  |  |
| Yes | 46 (8.27) | 41 (8.2) | 5 (9.1) | 0.999 |
| No | 510 (91.73) | 460 (91.8) | 50 (90.9) |  |
| **History of surgery** |  |  |  |  |
| Yes | 146 (26.26) | 130 (25.9) | 16 (29.1) | 0.733 |
| No | 410 (73.74) | 371 (74.1) | 39 (70.9) |  |
| **Current ability to perform activities of daily living** |  |  |  |  |
| Completely independent | 280 (50.36) | 265 (52.9) | 15 (27.3) | <0.001 |
| Requires partial assistance | 229 (41.19) | 192 (38.3) | 37 (67.3) |  |
| Requires extensive assistance/Completely dependent | 47 (8.45) | 44 (8.8) | 3 (5.5) |  |
| **Complication**s |  |  |  |  |
| Yes | 216 (38.85) | 200 (39.9) | 16 (29.1) | 0.156 |
| No | 340 (61.15) | 301 (60.1) | 39 (70.9) |  |

**Supplement Table 2. Univariable and multivariable regression analyses of factors associated with knowledge scores among patients with fractures**

| **Knowledge** | **Univariable analysis** |  | **Multivariable analysis** |  |
| --- | --- | --- | --- | --- |
| **β(95%CI)** | **P** | **β(95%CI)** | **P** |
| **Age (years)** |  |  |  |  |
| ≤30 |  |  |  |  |
| 31–40 | 1.204 (-0.093,2.500) | 0.069 | 1.244 (-0.045,2.532) | 0.059 |
| 41–50 | 1.705 (0.451,2.960) | 0.008 | 1.748 (0.501,2.995) | 0.006 |
| 51–60 | 1.321 (0.138,2.504) | 0.029 | 1.368 (0.192,2.544) | 0.023 |
| 61–70 | 2.043 (0.819,3.268) | 0.001 | 2.186 (0.965,3.408) | <0.001 |
| >70 | 0.722 (-0.552,1.996) | 0.266 | 0.913 (-0.361,2.188) | 0.161 |
| **Sex** |  |  |  |  |
| Male |  |  |  |  |
| Female | 0.215 (-0.382,0.812) | 0.480 |  |  |
| **BMI** |  |  |  |  |
| 18.5-23.9 |  |  |  |  |
| <18.5 | -0.202 (-1.407,1.002) | 0.742 |  |  |
| >24.0 | 0.050 (-0.572,0.671) | 0.875 |  |  |
| **Monthly per capita income (CNY)** |  |  |  |  |
| ＜2,000 |  |  |  |  |
| 2,000-5,000 | 0.465 (-0.510,1.439) | 0.349 |  |  |
| 5,000-10,000 | 0.271 (-0.679,1.220) | 0.576 |  |  |
| 10,000-20,000 | 0.066 (-1.144,1.277) | 0.914 |  |  |
| >20,000 | -1.132 (-3.186,0.921) | 0.279 |  |  |
| **Marital status** |  |  |  |  |
| Married |  |  |  |  |
| Unmarried/Divorced/Widowed | -0.801 (-1.894,0.292) | 0.151 |  |  |
| **Place of residence** |  |  |  |  |
| Rural |  |  |  |  |
| Urban | -0.412 (-1.133,0.309) | 0.262 |  |  |
| Suburban | 0.221 (-0.523,0.965) | 0.560 |  |  |
| **Educational level** |  |  |  |  |
| Primary school or below |  |  |  |  |
| Junior high school | -0.279 (-1.033,0.476) | 0.468 |  |  |
| Senior high school/Vocational secondary school | 0.324 (-0.614,1.262) | 0.498 |  |  |
| Junior college/Bachelor’s degree or above | 0.455 (-0.458,1.367) | 0.329 |  |  |
| **Medical insurance type** |  |  |  |  |
| Self-paid |  |  |  |  |
| Insurance reimbursement | -0.119 (-0.783,0.546) | 0.726 |  |  |
| **Have you ever sustained a fracture before this fracture?** |  |  |  |  |
| No |  |  |  |  |
| Yes | -1.263 (-2.341,-0.184) | 0.022 | -1.357 (-2.439,-0.275) | 0.014 |
| **History of surgery** |  |  |  |  |
| No |  |  |  |  |
| Yes | -0.410 (-1.087,0.268) | 0.236 |  |  |
| **Current ability to perform activities of daily living** |  |  |  |  |
| Requires extensive assistance/Completely dependent |  |  |  |  |
| Completely independent | -0.063 (-1.174,1.048) | 0.911 |  |  |
| Requires partial assistance | 0.048 (-1.080,1.176) | 0.933 |  |  |
| **Complication**s |  |  |  |  |
| No |  |  |  |  |
| Yes | 0.233 (-0.379,0.846) | 0.455 |  |  |

**Supplement Table 3. Univariable and multivariable regression analyses of factors associated with attitude scores among patients with fractures**

| **Attitude** | **Univariable analysis** |  | **Multivariable analysis** | |  |
| --- | --- | --- | --- | --- | --- |
| β(95%CI) | P | | β(95%CI) | P |
| **Knowledge** | 1.346 (1.248,1.444) | <0.001 | 1.355 (1.258,1.451) | | <0.001 |
| **Age (years)** |  |  |  | |  |
| ≤30 |  |  |  | |  |
| 31–40 | -0.704 (-3.050,1.643) | 0.556 |  | |  |
| 41–50 | -0.578 (-2.849,1.693) | 0.618 |  | |  |
| 51–60 | -1.068 (-3.209,1.073) | 0.328 |  | |  |
| 61–70 | -0.489 (-2.705,1.728) | 0.665 |  | |  |
| >70 | -1.036 (-3.341,1.270) | 0.378 |  | |  |
| **Sex** |  |  |  | |  |
| Male |  |  |  | |  |
| Female | 0.519 (-0.549,1.586) | 0.340 |  | |  |
| **BMI** |  |  |  | |  |
| 18.5-23.9 |  |  |  | |  |
| <18.5 | -0.428 (-2.582,1.726) | 0.696 |  | |  |
| >24.0 | -0.353 (-1.464,0.759) | 0.533 |  | |  |
| **Monthly per capita income (CNY)** |  |  |  | |  |
| ＜2,000 |  |  |  | |  |
| 2,000-5,000 | 0.912 (-0.829,2.653) | 0.304 |  | |  |
| 5,000-10,000 | 0.059 (-1.637,1.756) | 0.945 |  | |  |
| 10,000-20,000 | -0.478 (-2.641,1.686) | 0.665 |  | |  |
| >20,000 | -1.406 (-5.076,2.264) | 0.452 |  | |  |
| **Marital status** |  |  |  | |  |
| Married |  |  |  | |  |
| Unmarried/Divorced/Widowed | 1.978 (0.028,3.929) | 0.047 | 3.578 (2.234,4.922) | | <0.001 |
| **Place of residence** |  |  |  | |  |
| Rural |  |  |  | |  |
| Urban | -1.502 (-2.783,-0.221) | 0.022 | -0.858 (-1.730,0.014) | | 0.054 |
| Suburban | 0.461 (-0.861,1.784) | 0.494 | 0.052 (-0.820,0.924) | | 0.907 |
| **Educational level** |  |  |  | |  |
| Primary school or below |  |  |  | |  |
| Junior high school | -1.346 (-2.693,0.001) | 0.050 | -0.955 (-1.824,-0.087) | | 0.031 |
| Senior high school/Vocational secondary school | 0.233 (-1.442,1.907) | 0.785 | -0.246 (-1.349,0.858) | | 0.662 |
| Junior college/Bachelor’s degree or above | 0.132 (-1.498,1.761) | 0.874 | -1.222 (-2.384,-0.059) | | 0.040 |
| **Medical insurance type** |  |  |  | |  |
| Self-paid |  |  |  | |  |
| Insurance reimbursement | -0.557 (-1.745,0.631) | 0.357 |  | |  |
| **Have you ever sustained a fracture before this fracture?** |  |  |  | |  |
| No |  |  |  | |  |
| Yes | -0.583 (-2.521,1.355) | 0.555 |  | |  |
| **History of surgery** |  |  |  | |  |
| No |  |  |  | |  |
| Yes | -0.699 (-1.911,0.513) | 0.258 |  | |  |
| **Current ability to perform activities of daily living** |  |  |  | |  |
| Requires extensive assistance/Completely dependent |  |  |  | |  |
| Completely independent | -0.970 (-2.946,1.007) | 0.336 |  | |  |
| Requires partial assistance | 0.361 (-1.647,2.369) | 0.724 |  | |  |
| **Complication**s |  |  |  | |  |
| No |  |  |  | |  |
| Yes | -0.447 (-1.542,0.648) | 0.423 |  | |  |

**Supplement Table 4. Univariable and multivariable regression analyses of factors associated with practice scores among patients with fractures**

| **Practice** | **Univariable analysis** |  | **Multivariable analysis** |  |
| --- | --- | --- | --- | --- |
| β(95%CI) | P | β(95%CI) | P |
| **Knowledge** | 3.904 (3.669,4.139) | <0.001 | 2.056 (1.747,2.365) | <0.001 |
| **Attitude** | 2.165 (2.032,2.299) | <0.001 | 1.332 (1.161,1.503) | <0.001 |
| **Age (years)** |  |  |  |  |
| ≤30 |  |  |  |  |
| 31–40 | 7.596 (1.363,13.830) | 0.017 | 5.803 (2.694,8.912) | <0.001 |
| 41–50 | 9.445 (3.411,15.478) | 0.002 | 7.116 (4.082,10.151) | <0.001 |
| 51–60 | 6.307 (0.618,11.996) | 0.030 | 7.097 (4.088,10.107) | <0.001 |
| 61–70 | 7.191 (1.304,13.079) | 0.017 | 6.899 (3.543,10.255) | <0.001 |
| >70 | 1.694 (-4.432,7.819) | 0.587 | 5.210 (1.536,8.884) | 0.006 |
| **Sex** |  |  |  |  |
| Male |  |  |  |  |
| Female | 0.989 (-1.886,3.863) | 0.500 |  |  |
| **BMI** |  |  |  |  |
| 18.5-23.9 |  |  |  |  |
| <18.5 | -3.592 (-9.384,2.201) | 0.224 |  |  |
| >24.0 | 0.498 (-2.490,3.486) | 0.743 |  |  |
| **Monthly per capita income (CNY)** |  |  |  |  |
| ＜2,000 |  |  |  |  |
| 2,000-5,000 | 2.886 (-1.799,7.570) | 0.227 | -0.167 (-2.797,2.463) | 0.901 |
| 5,000-10,000 | 3.953 (-0.611,8.516) | 0.089 | 3.333 (0.376,6.290) | 0.028 |
| 10,000-20,000 | 5.729 (-0.091,11.548) | 0.054 | 6.531 (2.922,10.141) | <0.001 |
| >20,000 | -0.319 (-10.193,9.555) | 0.949 | 3.386 (-1.710,8.482) | 0.193 |
| **Marital status** |  |  |  |  |
| Married |  |  |  |  |
| Unmarried/Divorced/Widowed | -3.337 (-8.601,1.928) | 0.214 |  |  |
| **Place of residence** |  |  |  |  |
| Rural |  |  |  |  |
| Urban | -1.367 (-4.836,2.103) | 0.439 |  |  |
| Suburban | 1.958 (-1.624,5.539) | 0.283 |  |  |
| **Educational level** |  |  |  |  |
| Primary school or below |  |  |  |  |
| Junior high school | -1.649 (-5.285,1.987) | 0.373 |  |  |
| Senior high school/Vocational secondary school | 1.674 (-2.847,6.196) | 0.467 |  |  |
| Junior college/Bachelor’s degree or above | -0.524 (-4.923,3.875) | 0.815 |  |  |
| **Medical insurance type** |  |  |  |  |
| Self-paid |  |  |  |  |
| Insurance reimbursement | -1.342 (-4.540,1.856) | 0.410 |  |  |
| **Have you ever sustained a fracture before this fracture?** |  |  |  |  |
| No |  |  |  |  |
| Yes | -2.300 (-7.516,2.915) | 0.387 |  |  |
| **History of surgery** |  |  |  |  |
| No |  |  |  |  |
| Yes | -2.357 (-5.618,0.905) | 0.156 |  |  |
| **Current ability to perform activities of daily living** |  |  |  |  |
| Requires extensive assistance/Completely dependent |  |  |  |  |
| Completely independent | -0.677 (-6.023,4.669) | 0.804 |  |  |
| Requires partial assistance | 0.473 (-4.958,5.904) | 0.864 |  |  |
| **Complication**s |  |  |  |  |
| No |  |  |  |  |
| Yes | 0.179 (-2.771,3.129) | 0.905 |  |  |

**Supplement Table 5. Model fitting index of CFA**

| **Indicators** | **Reference** | **Actual** |
| --- | --- | --- |
| **RMSEA** | <0.080 | 0.056 |
| **SRMR** | <0.080 | 0.058 |
| **TLI** | >0.800 | 0.867 |
| **CFI** | >0.800 | 0.874 |

**Supplement Table 6. Total, direct, and indirect effects among knowledge, attitude, and practice in the structural equation model**

| **Model paths** | | Total effects | | Direct Effect | | Indirect effect | |
| --- | --- | --- | --- | --- | --- | --- | --- |
| β(95%CI) | P | β(95%CI) | P | β(95%CI) | P |
| Attitude |  |  |  |  |  |  |  |
|  | Knowledge | 0.913 (0.877, 0.949) | <0.001 | 0.913 (0.877, 0.949) | <0.001 |  |  |
| Practice |  |  |  |  |  |  |  |
|  | Knowledge | 0.946 (0.919, 0.972) | <0.001 | 0.710 (0.495, 0.925) | <0.001 | 0.235 (0.041, 0.430) | 0.018 |
|  | Attitude | 0.258 (0.040, 0.475) | 0.021 | 0.258 (0.040, 0.475) | 0.021 |  |  |

**Supplement Table 7. SEM model fit**

| **Indicators** | **Reference** | **Actual** |
| --- | --- | --- |
| **RMSEA** | <0.080 | 0.056 |
| **SRMR** | <0.080 | 0.058 |
| **TLI** | >0.800 | 0.867 |
| **CFI** | >0.800 | 0.874 |
